# Supplementary material for: Chronology and Eruption Dynamics of the Historic∼1700 CE Eruption of Tseax Volcano, British Columbia, Canada
Source: Frontiers journal article supplement (doi:10.3389/feart.2022.910451), 2022-06-22
Supplement: Table_1.docx [file Table_1.docx]

Supplementary Materials for:

**Chronology and Eruption Dynamism of the Historic ~ 1700 CE Eruption of Tseax Volcano, British Columbia, Canada**

**Yannick Le Moigne1*, Glyn Williams-Jones1, Nathalie Vigouroux1,2, James Kelly Russell3**

1Centre for Natural Hazards Research, Department of Earth Sciences, Simon Fraser University, Burnaby, BC, Canada

2Department of Earth and Environmental Sciences, Douglas College, New Westminster, Canada

3Department of Earth, Ocean and Atmospheric Sciences, University of British Columbia, Vancouver, BC, Canada.

*Corresponding author. Present address: Department of Earth Sciences, Simon Fraser University, 8888 University Drive, V5A 1S6, Burnaby, BC, Canada. Email: ylemoign@sfu.ca

**Table S1.** List of available written and oral stories concerning the eruption of Tseax.

| **Authors** | **Titles** |
| --- | --- |
| William Henry Collison  (1847-1922) | *In the Wake of the War Canoe (1915), Chapter XXI, The Nass River, p.267-274*  Collison initially observed the lava plain in 1874 when he canoed up the Nass River and noted its recent origin due to the presence of well-preserved fragments of trees and roots still encased in the lava. |
| James Benjamin McCullagh  (1854-1921) | *IGNIS, a Parable of the Great Lava Plain in the Valley of “Eternal Bloom”, Naas River, British Columbia.*  From Nisga’a stories, McCullagh turned the volcanic eruption into a poem influenced by Greek mythology as a battle between Ignis (fire), Lithos (earth) and Pluvius (water). |
| Charles Marius Barbeau  (1883-1969) | *Volcanoes on the Nass, Canadian Geographical Journal, 10(5), p. 215-225*  Barbeau, a Canadian ethnographer and folklorist, researched authentic oral histories of the Nisga’a in the 1910s and 1920s. He was told the story of the eruption of Tseax by Nisga’a elders living in the villages of *Gitwinksilhkw* and *Gitlaxt’aamiks*. |
| Nisga’a *Adaawak* | *Laxmihl (Where the Fire Ran Out)*  It is the only Nisga’a *Adaawak* publicly available that relates the eruption of Tseax volcano. An English translation of this *Adaawak* can be found on the Nisga’a Lisims Government website  (<https://www.nisgaanation.ca/volcano>). |
